# Supplementary material for: Tomato UV-B receptor SlUVR8 mediates plant acclimation to UV-B radiation and enhances fruit chloroplast development via regulating SlGLK2
Source: PubMed Central journal article supplement (PMC5904186; doi:10.1038/s41598-018-24309-y), 2018-04-17
Supplement: 41598_2018_24309_MOESM1_ESM.pdf [file 41598_2018_24309_MOESM1_ESM.pdf]

## Supplemental Figures and Table

**Title of manuscript:** Tomato UV-B receptor SIUVR8 mediates plant acclimation to UV-B radiation and enhances fruit chloroplast development via regulating SIGLK2

**Authors:** Huirong Li, Yuxiang Li, Heng Deng, Xiaochun Sun, Anquan Wang, Xiaofeng Tang, Yongfeng Gao, Ning Zhang, Lihuan Wang, Shuzhang Yang, Yongsheng Liu, and Songhu Wang

### Figure legends:

**Supplemental Figure 1.** The aligned conserved domains of SIUVR8 protein

(A) Structural domains of the SIUVR8 and AtUVR8 proteins. Analysis of protein sequences in the National Center for Biotechnology Information (NCBI) database was performed using the CD-search software.

(B) Amino acid sequence alignment of UVR8 proteins from *Solanum lycopersicum*, *Arabidopsis*, *Nicotiana tomentosiformis*, *Populus trichocarpa*, and *Oryza sativa*. The alignment was constructed using the DNAMAN version 5.2.2 software, and highlighting was by Boxshade ([http://ch.embnet.org/software/BOX\\_form.html](http://ch.embnet.org/software/BOX_form.html)). Identical residues are indicated by black boxes. Red dots above the sequences indicate the 14 conserved tryptophan residues and the red frames indicate the triad tryptophans (positions 233, 285, 337 in the Arabidopsis sequence) that form a pyramid arrangement with W94 on the adjacent monomer. Black dots above the sequences indicate the two arginine residues (positions 286, 338 in the Arabidopsis sequence) that are key to maintaining the AtUVR8 dimer. Red lines under the sequences indicate the conserved "GWRHT" motifs and the green box indicates the conserved C27 region. Blue lines indicate the seven blades compared with AtUVR8. Grey lines under the AtUVR8 sequence indicate the missing residues in the AtUVR8 crystal structure.

**Supplemental Figure 2.** The phylogenetic analysis of SIUVR8 protein

Phylogenetic analysis of UVR8 proteins of plants. The phylogenetic tree was constructed using MEGA4 via the neighbor-joining method. Bootstrap values from 1000 replicates were calculated and are indicated at branch points on the neighbor-joining tree. The tree includes SIUVR8(XP\_010321071.1) from *Solanum lycopersicum*, StUVR8(CAC84597.2) from *Solanum tuberosum*, BvUVR8(XP\_010695065.1) from *Beta vulgaris*, BpUVR8(AHY02156.1) from *Betula platyphylla*, BdUVR8(XP\_003579788.1) from *Brachypodium distachyon*, BrUVR8(XP\_009112108.1) from *Brassica rapa*, CsCUVR8(XP\_010484148.1) from *Camelina sativa* (L.) Crantz, CsUVR8(XP\_006464912.1) from *Citrus sinensis*, CmUVR8(XP\_008442146.1) from *Cucumis melo*, EgJUVR8(XP\_010930682.1) from *Elaeis guineensis* Jacq, EgUVR8(XP\_010025746.1) from *Eucalyptus grandis*, MdUVR8(XP\_008394185.1) from *Malus domestica*, MaUVR8(XP\_009404858.1) from *Musa acuminates*, NnUVR8(XP\_010270276.1) from *Nelumbo nucifera*, PmUVR8(XP\_008227523.1) from *Prunus mume*, PbUVR8(XP\_009355901.1) from *Pyrus x bretschneideri*, RcUVR8(XP\_002522929.1) from *Ricinus communis*, NtUVR8(XP\_009626007.1) from *Nicotiana tomentosiformis*, SiUVR8(XP\_011099677.1) from *Sesamum indicum*, SiBUBR8(XP\_004975662.1) from *Setaria italica* (L.) Beauv. var. *germanica* (Mill.) Schrad, ThUVR8(XP\_010547681.1) from *Tarenaya hassleriana*, PeUVR8(XP\_011022871.1) from *Populus euphratica*.

**Supplemental Figure 3** SIUVR8 and SIHY5 expression in fruits from transgenic plants.

Real-time quantitative PCR analysis of *SIUVR8*, and *SIHY5* in Ailsa Craig (*WT*), *35S::SIUVR8Ri* and *35S::SIUVR8OE* transgenic lines. Total RNAs were extracted from fruit pericarps of immature fruits

(25 DPA) from field-grown plants. Error bars represent SD of 3 biological replicates. “\*” and “\*\*\*” means  $P < 0.05$  and  $P < 0.001$  respectively (Student’s *t* test).

**Supplemental Figure 4** The uncropped gel of Figure 1C.

Red frame indicates the cropped position.



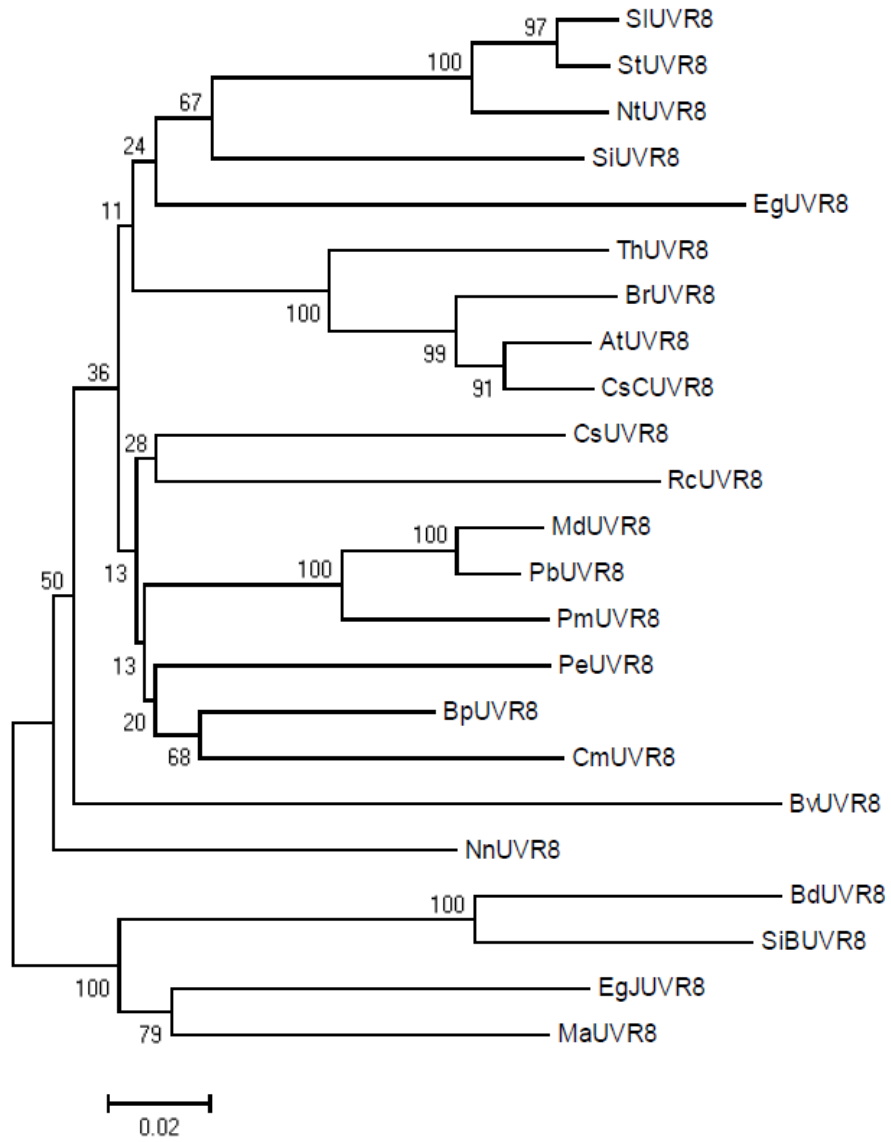

**Supplemental Figure 2.** The phylogenetic analysis of SIUVR8 protein

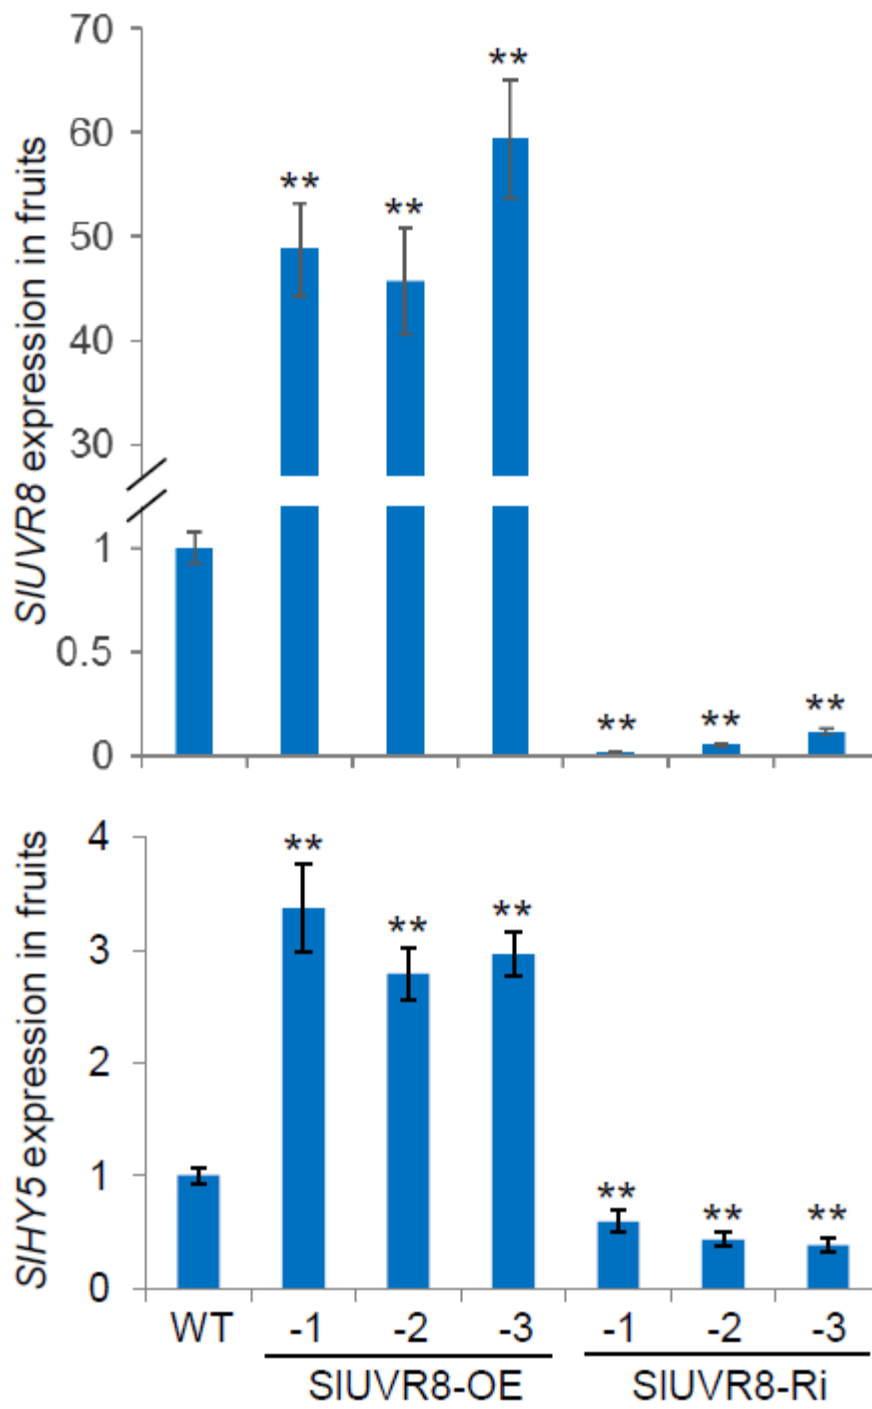

**Supplemental Figure 3** *SIUVR8* and *SIHY5* expression in fruits from transgenic plants

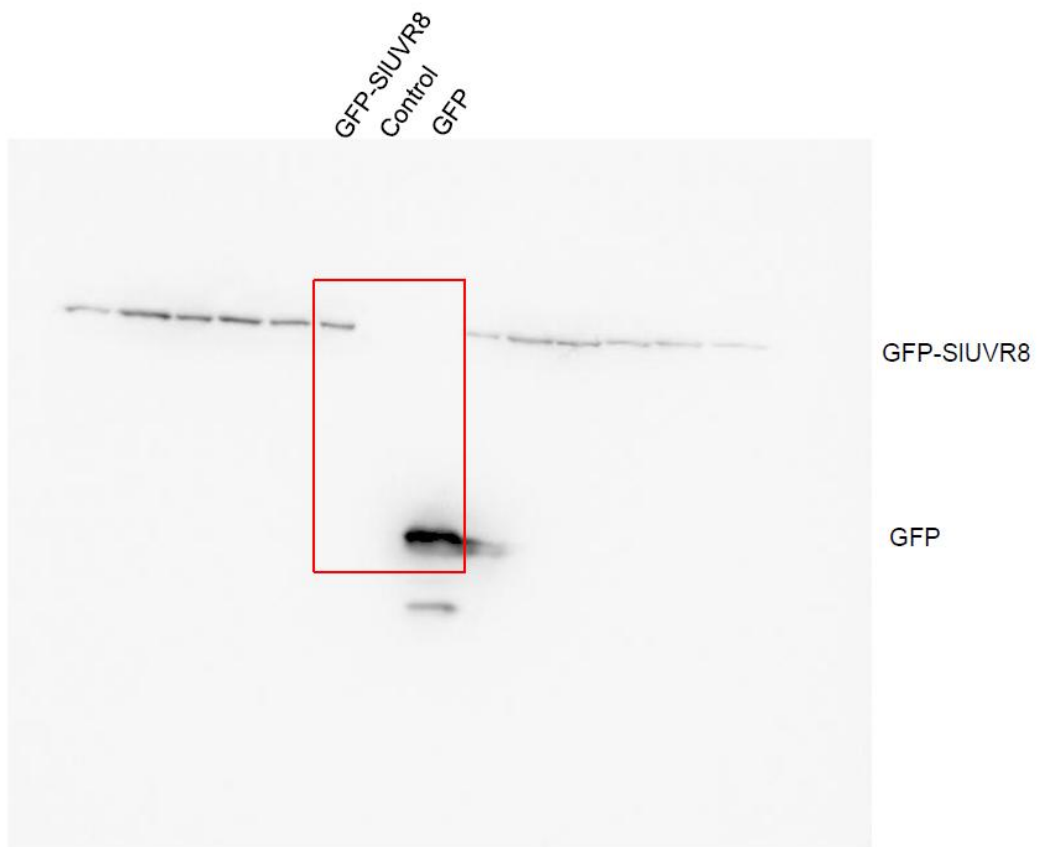

**Supplemental Figure 4** The uncropped gel of Figure 1C

| Primer       | Sequence                     | Usage              |
|--------------|------------------------------|--------------------|
| SIUVR8outF   | CCTTCCATAAAAAAAAAATTCC       | gene-cloning       |
| SIUVR8outR   | AGTCCACCATCCACTGCTAG         | gene-cloning       |
| SIUVR8F1     | TCTAGAATGGCGGACGGAAGAGGT     | gene-cloning       |
| SIUVR8R1     | GAGCTCTCATAATCGGATCCTTTTCACA | gene-cloning       |
| SIUVR8F2     | GGTACCATGGCGGACGGAAGAGGT     | GFP fusion protein |
| SIUVR8R2     | CTCGAGTAATCGGATCCTTTTCACATCA | GFP fusion protein |
| SIUVR8rtimeF | GCAGAGTTGGGGGCGAAA           | Real-time PCR      |
| SIUVR8rtimeR | TTTCTCCCACATCGGCTGA          | Real-time PCR      |
| SICHSrtimeF  | TTTTGGTGATGGGGCGGC           | Real-time PCR      |
| SICHSrtimeR  | GCCTTCGCTATCGGGGACA          | Real-time PCR      |
| SIHY5rtimeF  | AGCGACGAGTTCTATTGCCG         | Real-time PCR      |
| SIHY5rtimeR  | GCTTCTCCGCCCATCTCC           | Real-time PCR      |
| SICHLHrtimeF | TCTCAAACGCTTCGGGTTCTTA       | Real-time PCR      |
| SICHLHrtimeR | TCAAAAACCTTCTCTTCTCCATCA     | Real-time PCR      |
| SIPsbQrtimeF | TGGTCTTGTTGCTGCTGGC          | Real-time PCR      |
| SIPsbQrtimeR | CAAAGTTCCAGGCAATCCACC        | Real-time PCR      |
| SIPsaLrtimeF | CTTCACCGTCAAGGCTGTCC         | Real-time PCR      |
| SIPsaLrtimeR | GATAGGCAGGCAAGTTGGAGAG       | Real-time PCR      |
| SIGLK2rtimeF | CCTTACATGTTTGGGGGCATCCAC     | Real-time PCR      |
| SIGLK2rtimeR | GGGGTGCAAATCAGAGGC           | Real-time PCR      |

**Table S1 The primer used in this study**
